# Supplementary material for: Metabolomics Analysis of PK-15 Cells with Pseudorabies Virus Infection Based on UHPLC-QE-MS
Source: MDPI journal article supplement (doi:10.3390/v14061158), 2022-05-27
Supplement: s1 [file s1]

Table S1 Primer sequences used for qPCR

| Gene Name | Full name                                                |         | Primer Sequence (5'-3') |
|-----------|----------------------------------------------------------|---------|-------------------------|
| SPHK1     | sphingosine kinase 1                                     | Forward | TCCAGGCCGACATTTCCTTC    |
|           |                                                          | Reverse | TCAGCCCGTCTCCAGACATA    |
| SPHK2     | sphingosine kinase 2                                     | Forward | CCCGATTGCTCCTACTGGTC    |
|           |                                                          | Reverse | TCTCCCGAGACTGTGACGAT    |
| SPTLC1    | serine palmitoyltransferase long chain<br>base subunit 1 | Forward | AACCTCTTGTCCCTCCTGTCT   |
|           |                                                          | Reverse | CACAAGTCCCCACACCATACT   |
| SPTLC2    | serine palmitoyltransferase long chain<br>base subunit 2 | Forward | TGCGGACACATTCTCACAGT    |
|           |                                                          | Reverse | ATCCTACCACAACGACACCG    |
| SPTLC3    | serine palmitoyltransferase long chain<br>base subunit 3 | Forward | ACCACGCATCTCTTGTGCTT    |
|           |                                                          | Reverse | CTGGGGCAGATACACGATGG    |
| SPTSSA    | serine palmitoyltransferase small<br>subunit A           | Forward | GGAAGCAAATGTCTGGTTCT    |
|           |                                                          | Reverse | GAATTGAACACAGTCCGCTCC   |
| SPTSSB    | serine palmitoyltransferase small<br>subunit B           | Forward | TGCTGTGCTGTCTTAGAGCC    |
|           |                                                          | Reverse | CAGGCGAATGTGGATTGGGA    |
| SMPD1     | sphingomyelin phosphodiesterase 1                        | Forward | GGGTTCTATGCCCTTTCCCC    |
|           |                                                          | Reverse | CCTCGTCGTAGAACACCTCG    |
| SMPD2     | sphingomyelin phosphodiesterase 2                        | Forward | TGGATTGGTGCTCAATGCCT    |
|           |                                                          | Reverse | CAGGCACCATCGTACAACCT    |
| SMPD3     | sphingomyelin phosphodiesterase 3                        | Forward | GATGTCGGGGTCTATGGCTG    |
|           |                                                          | Reverse | GAAATCAGCCAGCCAGTCCT    |
| SGPL1     | sphingosine-1-phosphate lyase 1                          | Forward | ATCGGGAACCTGGCCTTTGAG   |
|           |                                                          | Reverse | AAGCCTCCCAGACAAGCATC    |
| SGMS1     | sphingomyelin synthase 1                                 | Forward | TGGCACGCTGTACCTGTATC    |
|           |                                                          | Reverse | GGGCTTCCCAGTCTCCAAAA    |
| SGMS2     | sphingomyelin synthase 2                                 | Forward | TTGCCTTCGTGTACGCTCTT    |
|           |                                                          | Reverse | AGTTAGTGTACAGCACGACGG   |
| FASN      | fatty acid synthase                                      | Forward | CTGCTGGACTCGCTCTTTGA    |
|           |                                                          | Reverse | CTTTGCCTATGTGCTTGCCC    |
| HMGCR     | 3-hydroxy-3-methylglutaryl-CoA<br>reductase              | Forward | AAAGGAGGCATTGACAGCA     |
|           |                                                          | Reverse | ATCACCTGACCTGGACTGGA    |
| ACACA     | acetyl-CoA carboxylase alpha                             | Forward | CCAGCACTCCCGCTTCATAA    |
|           |                                                          | Reverse | GTAAGGCCAAGCCATCCTGT    |
| CEPT1     | choline/ethanolamine<br>phosphotransferase 1             | Forward | ATTTGCTGGCAGTGATTGGAG   |
|           |                                                          | Reverse | GACGCTTGTTCTGCTATGGT    |
| PCYT2     | phosphate cytidylyltransferase 2                         | Forward | GAGGTCAACCGCTACAAGGG    |
|           |                                                          | Reverse | ACGATCTCCGTCTTCCCGT     |

|        |                                   |         |                         |
|--------|-----------------------------------|---------|-------------------------|
| PCYT1A | phosphate cytidylyltransferase 1A | Forward | GCCAGACGGAACCTACAGAG    |
|        |                                   | Reverse | ACAGAACTTCAGTGCTCCTTC   |
| PTDSS1 | phosphatidylserine synthase 1     | Forward | ATGCTTACCTCACCGACACG    |
|        |                                   | Reverse | AGTGCTCTGCATACCACACC    |
| PISD   | phosphatidylserine decarboxylase  | Forward | ATGTCCAAACCCGCCCTGAA    |
|        |                                   | Reverse | GGCCTCCTTCATGTTACCCC    |
| ACTB   | actin beta                        | Forward | CTCCATCATGAAGTGCGACGT   |
|        |                                   | Reverse | GTGATCTCCTTCTGCATCCTGTC |

---
